# Supplementary material for: Dysregulated Immune Responses by ASK1 Deficiency Alter Epithelial Progenitor Cell Fate and Accelerate Metaplasia Development during H. pylori Infection
Source: MDPI journal article supplement (doi:10.3390/microorganisms8121995), 2020-12-14
Supplement: s1 [file s1]

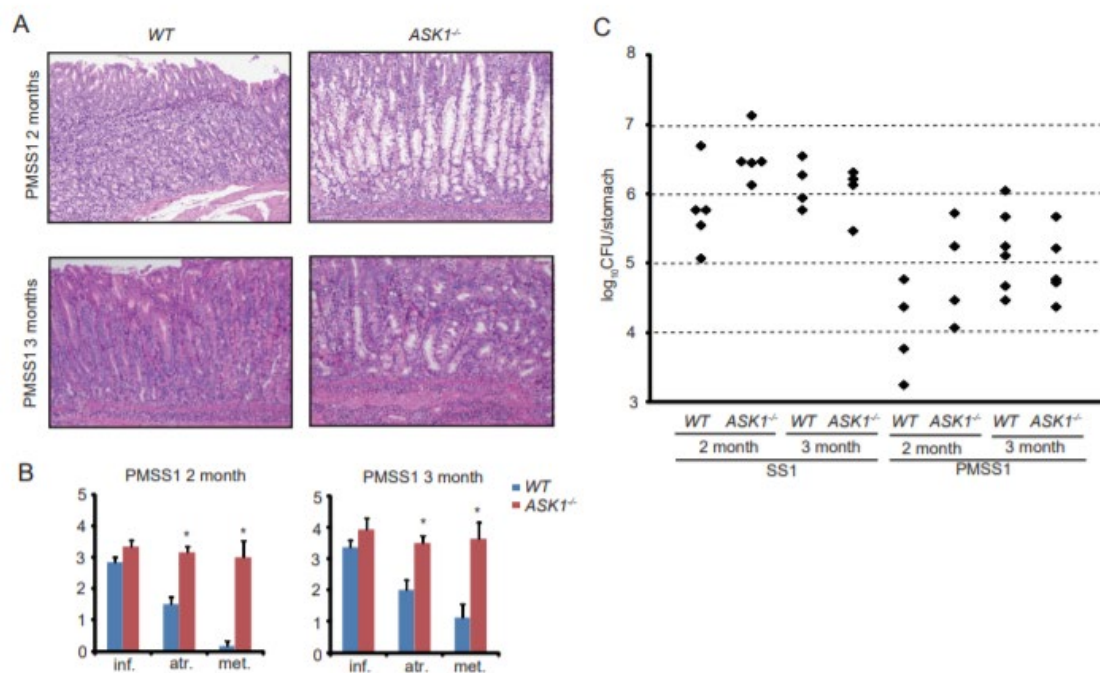

**Supplementary Figure S1.** PMSS-1 infection experiments. **(A)** Representative H&E staining of WT and ASK1<sup>-/-</sup> mouse stomach with *H. pylori* PMSS-1 infection. Original magnification, ×100. **(B)** Histological scoring of PMSS-1-infected WT and ASK1<sup>-/-</sup> mouse stomach. Inf., inflammation; atr., atrophy; met., metaplasia; hyp., hyperplasia. Data are shown as mean ± SD. \**P* < 0.05 compared to infected WT mice. **(C)** Colony-forming units of *H. pylori* isolated from the infected WT and ASK1<sup>-/-</sup> mouse stomach.

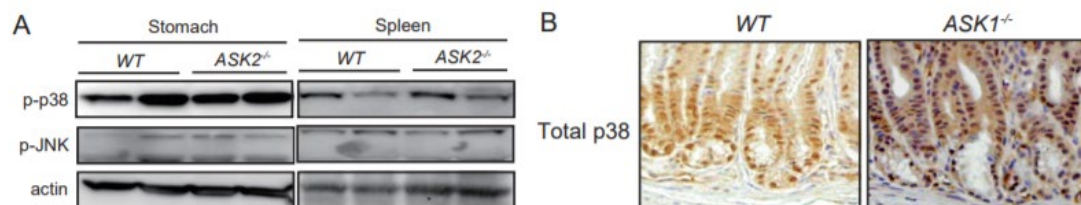

**Supplementary Figure S2.** ASK1, not ASK2, is responsible for downstream MAPK activation in the stomach. **(A)** Immunoblotting of WT and ASK2<sup>-/-</sup> mouse stomach and spleen infected with SS-1. **(B)** Total p38 staining in SS-1-infected WT and ASK1<sup>-/-</sup> stomach. Original magnification, ×200.

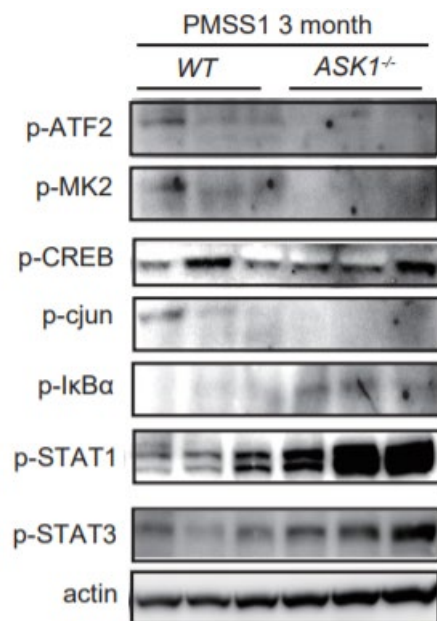

**Supplementary Figure S3.** ASK1 deficiency induced NF-κB and STAT1 activation in the PMSS-1 infected stomach. Immunoblotting of PMSS-1-infected WT and ASK1<sup>-/-</sup> mouse stomachs.

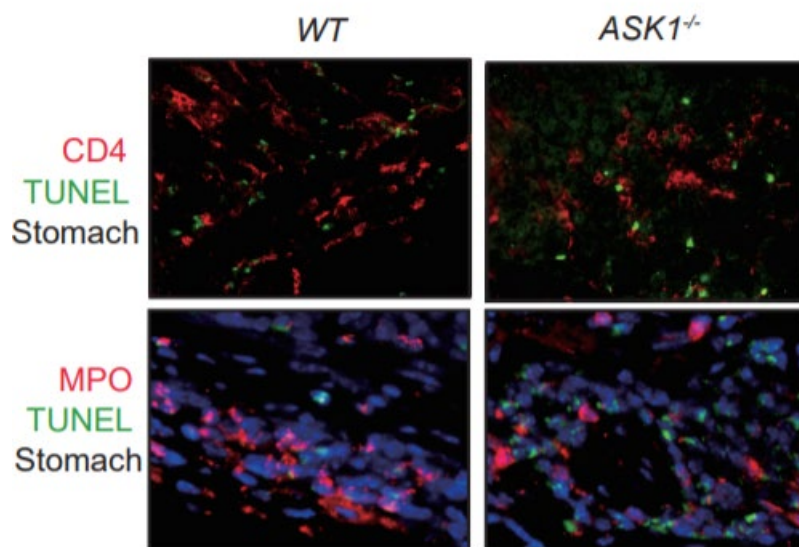

**Supplementary Figure S4.** ASK1 deficiency did not promote apoptosis in T cells and neutrophils. Immunofluorescent staining combined with TUNEL assay in SS-1-infected WT and ASK1<sup>-/-</sup> stomach and spleen. Original magnification, ×200.
